# Supplementary material
Source: publisher site journal article supplement (https://www.dovepress.com/article/535460)

**Supplementary Figure 1** Chemical structures of representative STING agonists listed in

Table 1.

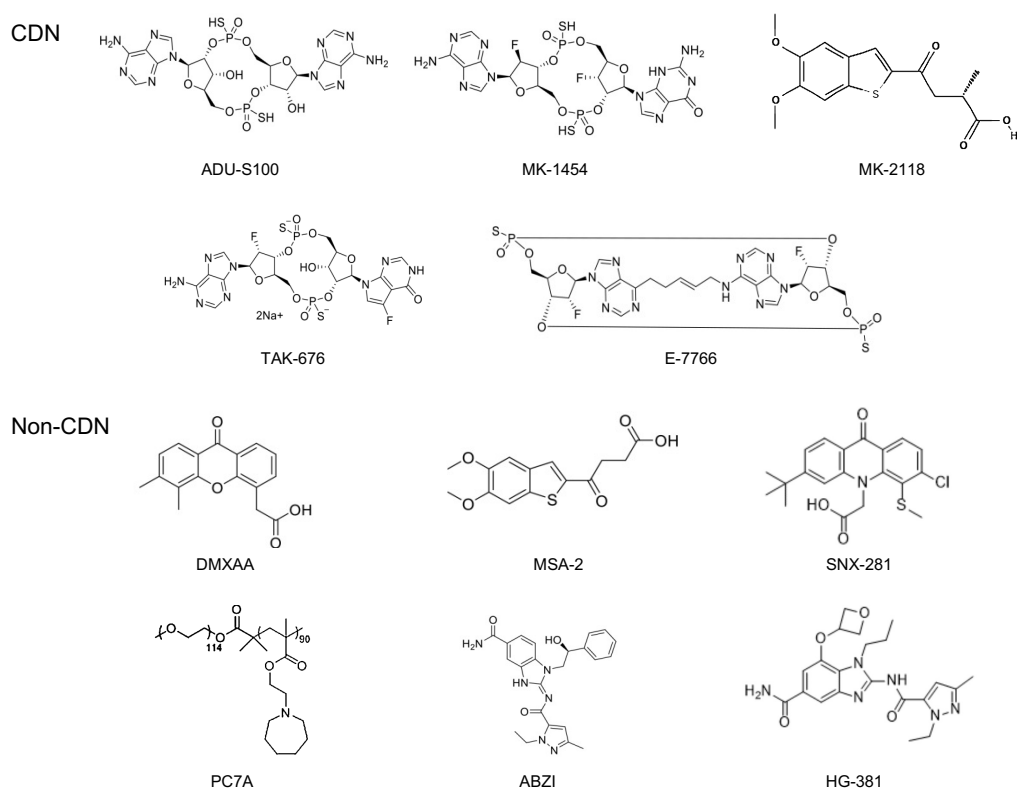

Supplement: Supplementary file 1 [file Supplementary%252520Figure%2525201%252520%252520_1.pdf]
